# Supplementary material
Source: publisher site journal article supplement (https://www.dovepress.com/article/328677)
Supplement: Supplementary file 1 [file get_supplementary_file.php]

**Appendix 1. Knowledge, Attitude, and Practice towards COVID-19 among healthcare students in Vietnam**

Please note that we are asking you to choose a correct or write a text with each item.

Personal Information

1. Gender: 🞎 Male 🞎 Female
2. Age: years old
3. Specialty:

🞎 Medicine 🞎 Dentistry 🞎 Pharmacy 🞎 Traditional medicine

🞎 Nursing-medical engineering 🞎 Public health

1. Level of education: 🞎 Undergraduate 🞎Postgraduate
2. Internship at the hospital: 🞎 Yes 🞎 No
3. Living conditions: 🞎 Family 🞎 Relatives 🞎 Friends 🞎 Alone
4. Source of COVID-19 information* (*you can choose many options*)

🞎 Social media 🞎 Websites of hospital/ Health ministry/WHO

🞎 Local government 🞎 Training courses toward COVID-19

🞎 Relatives 🞎 Other:

**Knowledge toward COVID-19**

1. Is the COVID-19 caused by SARS-CoV-2?

🞎 Yes 🞎 No

1. Is the COVID-19 transmission due to close contact with an infected person through droplets

🞎 Yes 🞎 No

1. Are possible common signs/symptoms of COVID-19 including Fever or Cough or fatigue or sputum production or shortness of breath?

🞎 Yes 🞎 No

1. Is there a specific medication for the treatment of COVID-19?

🞎 Yes 🞎 No

1. Can Washing hands with soap and water, using face masks, cleaning surfaces, and avoiding crowded places prevent the transmission?

🞎Yes 🞎No

1. Are patients with underlying chronic diseases more likely to have severe symptoms and die from Covid-19?

🞎Yes 🞎No

**Attitudes toward COVID-19**

1. I think I will probably get the illness

🞎Strongly agree 🞎Agree

🞎Neither agree nor disagree

🞎 Disagree 🞎Strongly disagree

1. I am worried one of my family members may get an infection

🞎Strongly agree 🞎Agree

🞎Neither agree nor disagree

🞎 Disagree 🞎Strongly disagree

1. If getting COVID-19, I will accept isolation in health facilities

🞎Strongly agree 🞎Agree

🞎Neither agree nor disagree

🞎 Disagree 🞎Strongly disagree

1. Transmission of COVID-19 can be prevented by washing hands with soap frequently and wearing a mask

🞎Strongly agree 🞎Agree

🞎Neither agree nor disagree

🞎 Disagree 🞎Strongly disagree

1. Prevalence of COVID-19 infection can be reduced by the active participation of health care workers in hospital infection control programs

🞎Strongly agree 🞎Agree

🞎Neither agree nor disagree

🞎 Disagree 🞎Strongly disagree

1. If a COVID-19 vaccine was available, I would recieve it

🞎 Strongly agree 🞎 Agree

🞎 Neither agree nor disagree

🞎 Disagree 🞎 Strongly disagree

1. COVID-19 patients should be kept in isolation

🞎 Strongly agree 🞎 Agree

🞎 Neither agree nor disagree

🞎 Disagree 🞎 Strongly disagree

1. I am ready to participate as a volunteer to support the health force

🞎 Strongly agree 🞎 Agree

🞎 Neither agree nor disagree

🞎 Disagree 🞎 Strongly disagree

**Practices toward COVID-19**

1. Do you wash your hands frequently?

🞎 Yes 🞎 No

1. Do you usually wash hands with soap and water or alcohol hand sanitizer?

🞎 Yes 🞎 No

1. What is the average time you spend washing your hands at least 20 seconds?

🞎 Yes 🞎 No

1. Do you usually wear a mask when in public or exposing yourself to others?

🞎 Yes 🞎 No

1. Do you usually wear mask to cover your mouth and nose?

🞎 Yes 🞎 No

1. Do you adhere to social distancing according to the Ministry of Health's instructions?

🞎 Yes 🞎 No

1. Do you avoid unnecessary travel and stay away from large groups of people?

🞎 Yes 🞎 No

1. Would you follow the guidelines of the Ministry of Health if you are suspected of have the Covid-19 infection?

🞎 Yes 🞎 No

Notes: Reproduced with permission from Huynh G, Nguyen TN, Tran VK, Vo KN, Vo VT, Pham LA. Knowledge and attitude toward COVID-19 among healthcare workers at District 2 Hospital, Ho Chi Minh City. Asian Pac J Trop Med. 2020;13(6):260-5.17
